# Supplementary material for: Synthesis of polymer/inorganic nanocomposite films using highly porous inorganic scaffolds
Source: Royal Society of Chemistry journal article supplement (doi:10.1039/c2nr12029a), 2012-01-01
Supplement: c2nr12029a.pdf [file c2nr12029a.pdf]

## **Synthesis of Polymer/Inorganic Nanocomposite Films using Highly Porous Inorganic Scaffolds**

Huanjun Zhang,<sup>a</sup> Matthias Popp,<sup>b</sup> Andreas Hartwig<sup>b</sup> and Lutz Mädler\*<sup>a</sup>

<sup>a</sup> *Foundation Institute of Materials Science (IWT), Department of Production Engineering, University of Bremen, Badgasteiner Strasse 3, 28359 Bremen, Germany.*

*Fax: +49 421 2185378;*

*Tel: +49 421 21851200;*

*E-mail: lmaedler@iwt.uni-bremen.de*

<sup>b</sup> *Fraunhofer–Institute for Manufacturing Technology and Advanced Materials (IFAM), Wiener Strasse 12, 28359 Bremen, Germany.*

*Fax: +49 421 2246430;*

*Tel: +49 421 2246470;*

*E-mail: andreas.hartwig@ifam.fraunhofer.de*

**Enclosure: Three figures**

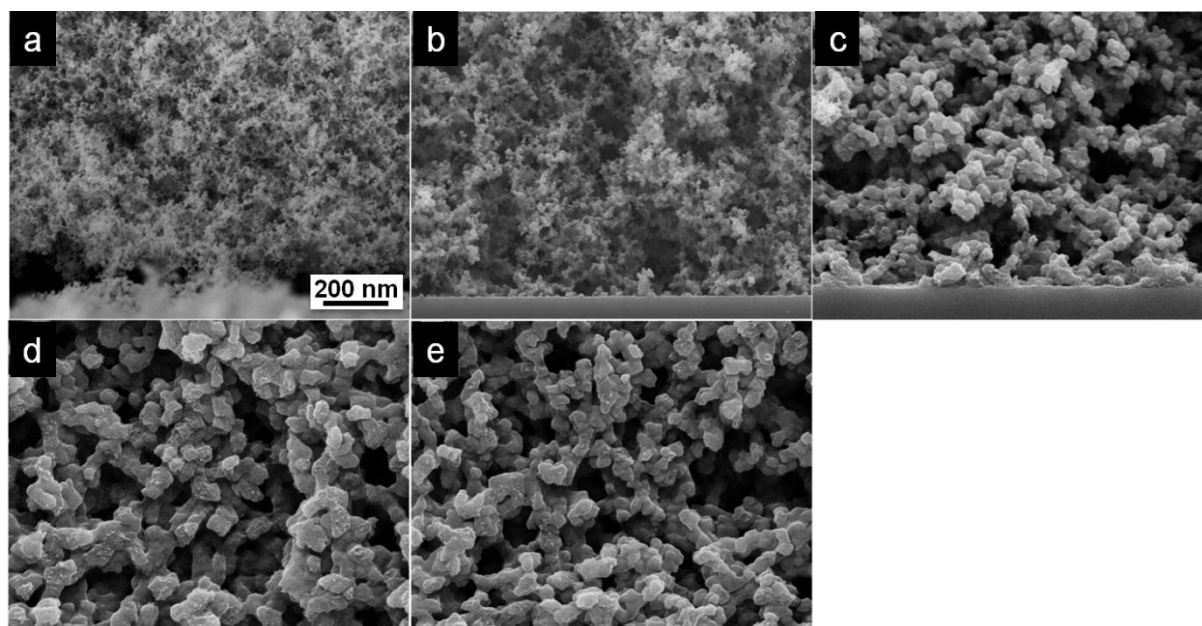

**Fig. S1** The morphology/structure evolution of the polycyanoacrylate/SnO<sub>2</sub> composite films: a) 10 min, b) 30 min, c) 60 min, d) 120 min and e) 180 min. The shown SEM images were recorded at the film/glass interface region for each sample.

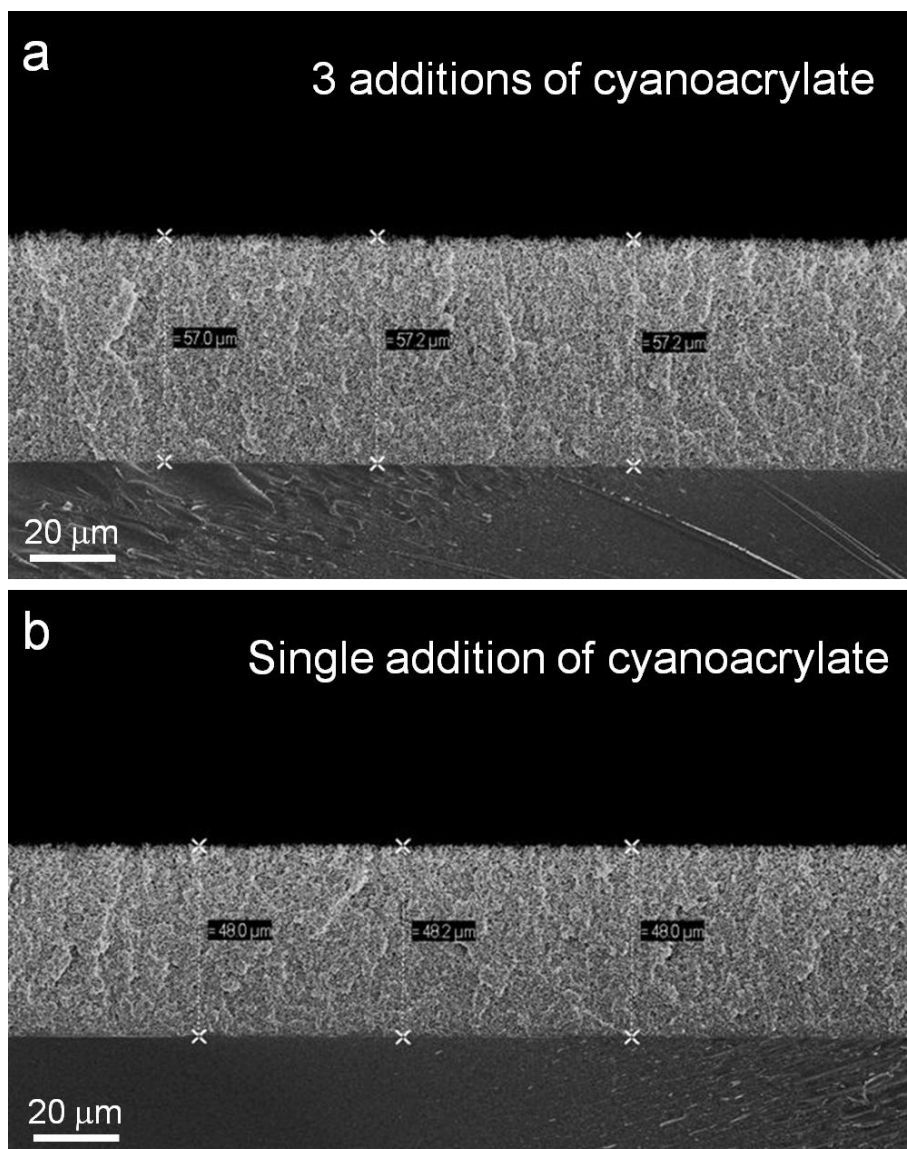

**Fig. S2** Effects of refreshing the monomer reservoir on the nanocomposite film growth: refreshing twice the monomer reservoir during the polymerization process results in a thicker (57 μm) nanocomposite film than that obtained without refreshing the monomer reservoir (48 μm). Note that the two SnO<sub>2</sub> layers were prepared here with a larger nozzle-to-substrate distance (25 cm, as compared with 20 cm to prepare layers reported in Fig. 4). The larger distance results in a thinner SnO<sub>2</sub> scaffold layer, and subsequently, leads to a thinner composite film in this figure (sample (b), 48 μm) than that reported in Fig. 4b.

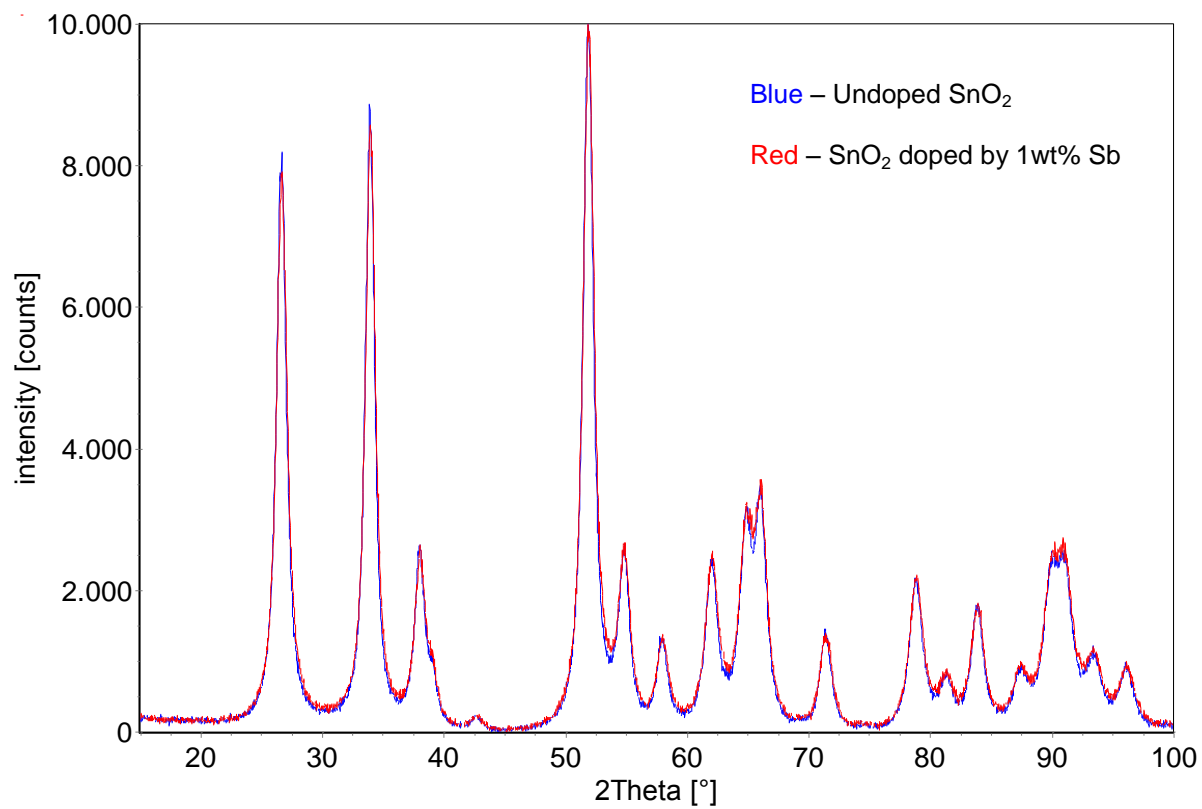

**Fig. S3** Powder XRD patterns of the undoped and 1wt% Sb-doped SnO<sub>2</sub> samples (color in electronic file).
